# Supplementary material for: Redox Activity of Sodium Vanadium Oxides towards Oxidation in Na Ion Batteries
Source: MDPI journal article supplement (doi:10.3390/ma11061021), 2018-06-15
Supplement: s1 [file s1]

# Redox Activity of Sodium Vanadium Oxides Towards Oxidation in Na Ion Batteries

The following are the detailed information about the Supplementary Materials.

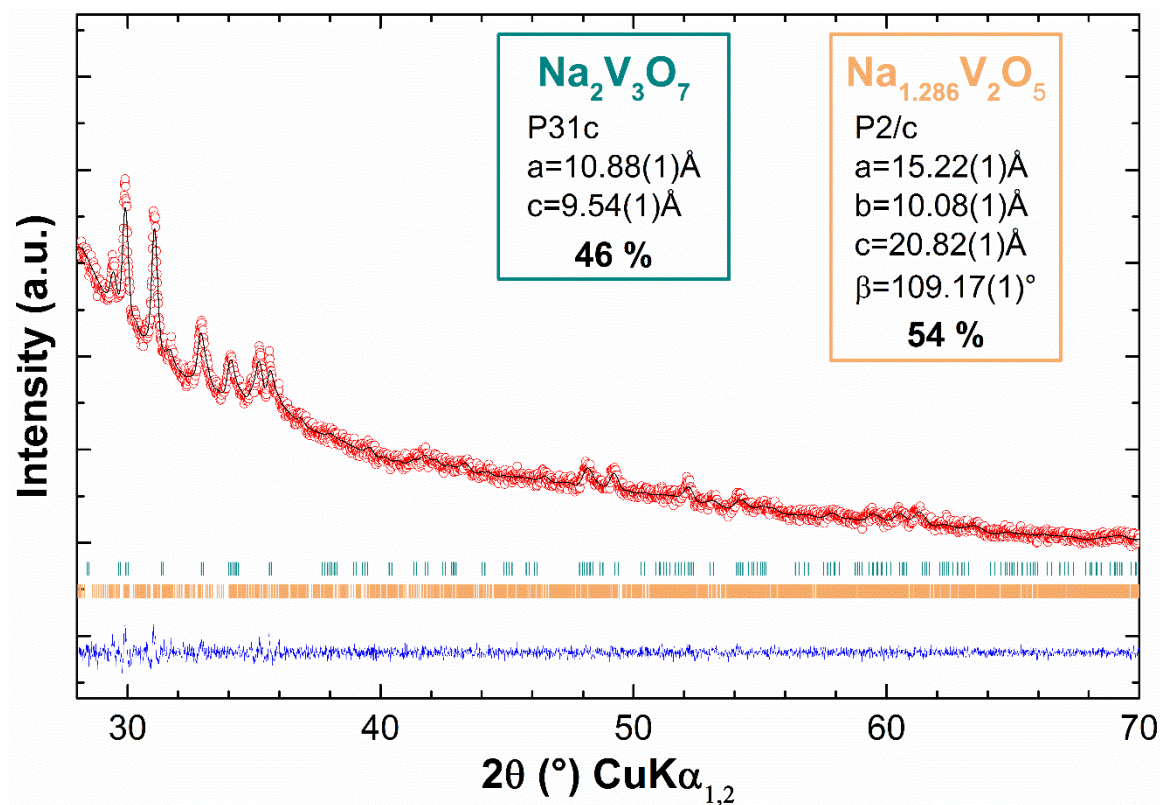

Figure S1: XRD pattern and Rietveld fit of chemically oxidized  $\text{Na}_2\text{V}_3\text{O}_7$ . Bragg reflections for  $\text{Na}_2\text{V}_3\text{O}_7$  and  $\eta\text{-Na}_{1.286}\text{V}_2\text{O}_5$  are indicated in cyan and orange, respectively.

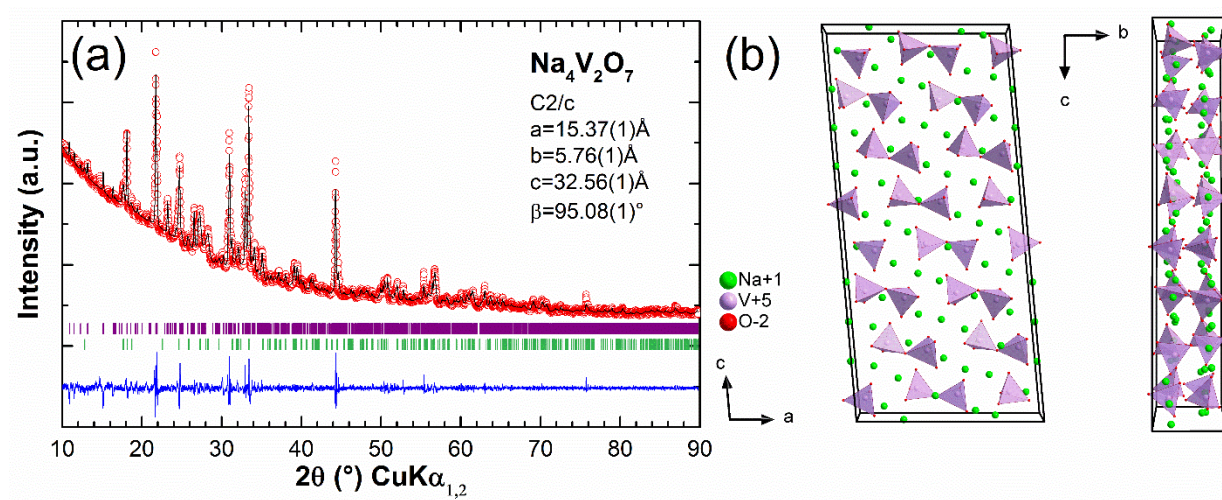

Figure S2: (a) XRD pattern and Le Bail fit for  $\text{Na}_4\text{V}_2\text{O}_7$ . Note the presence of  $\text{NaVO}_3$  as impurity (14%). Bragg reflections for  $\text{Na}_4\text{V}_2\text{O}_7$  and  $\text{NaVO}_3$  are indicated in purple and green, respectively. (b) Structural view along the b and the a axis for  $\text{Na}_4\text{V}_2\text{O}_7$ .

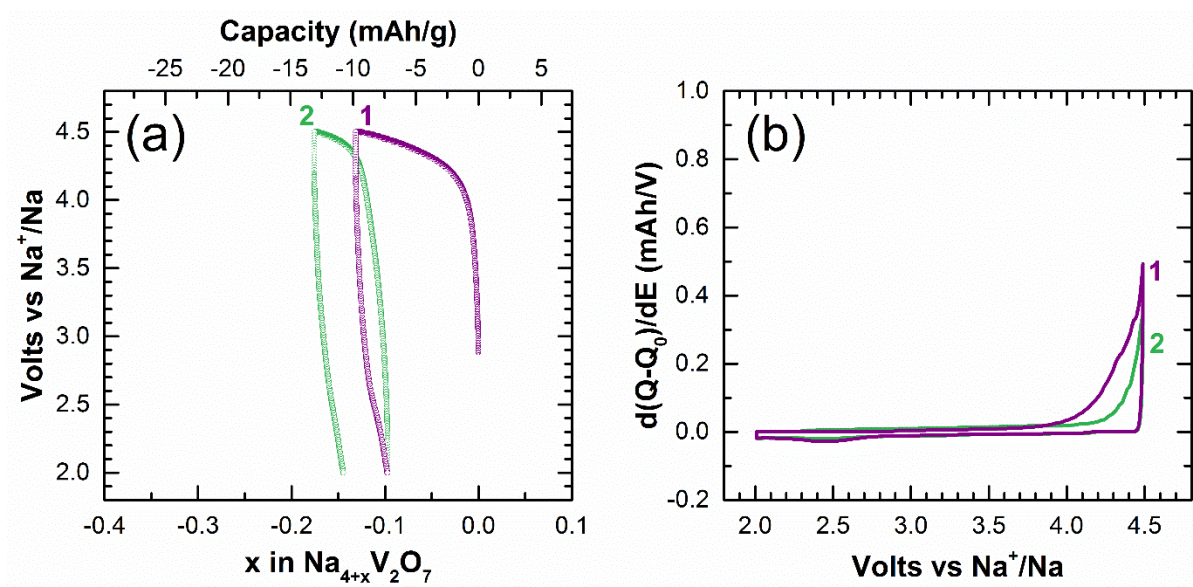

Figure S3: (a) Voltage vs. composition profiles of  $\text{Na}_4\text{V}_2\text{O}_7$  between 4.5 V and 2.0 V at a rate of C/20 and (b) corresponding derivative curves.
